# Supplementary material for: Determination and Kinetic Characterization of a New Potential Inhibitor for AmsI Protein Tyrosine Phosphatase from the Apple Pathogen Erwinia amylovora
Source: MDPI journal article supplement (doi:10.3390/molecules28237774), 2023-11-25
Supplement: s1 [file s1]

# SUPPORTING INFORMATION

## Determination and kinetic characterization of a new potential inhibitor for AmsI protein tyrosine phosphatase from the apple pathogen *Erwinia amylovora*

Simone Albani<sup>1,2,+</sup>, Ivan Polsinelli<sup>3,+</sup>, Luca Mazzei<sup>1</sup>, Francesco Musiani<sup>1,\*</sup>, Stefano Benini<sup>3,\*</sup>

<sup>1</sup> Laboratory of Bioinorganic Chemistry, Department of Pharmacy and Biotechnology, University of Bologna, Italy

<sup>2</sup> Present address: Institute for Neuroscience and Medicine (INM-9), Forschungszentrum Jülich, Jülich, 52425, Germany

<sup>3</sup> Bioorganic chemistry and Bio-Crystallography laboratory (B2CI), Faculty of Agricultural, Environmental and Food Sciences, Free University of Bolzano, 39100 Bolzano, Italy

+ These authors equally contributed to this work.

\* Correspondence: francesco.musiani@unibo.it; stefano.benini@unibz.it

**Table S1.** Selection of protein structures for redocking [1–3], jFATCat rigid score [4] and sequence identity (SI) with respect to *EaAmsI*.

| PDB id | Organism                | Resolution | Crystal pH | Ligand IUPAC name                                     | jFATCat rigid score | SI (%) |
|--------|-------------------------|------------|------------|-------------------------------------------------------|---------------------|--------|
| 4D74   | <i>E. amylovora</i>     | 1.57 Å     | 5.5        | -                                                     | 432.00              | 100%   |
| 4LRQ   | <i>V. cholerae</i> O395 | 1.45 Å     | 5.5        | 3[N-morpholino]propane sulfonic acid                  | 348.88              | 28.38% |
| 5JNT   | <i>Homo Sapiens</i>     | 1.45 Å     | 6.5        | 2-(N-morpholino)-ethane sulphonic acid                | 339.63              | 25.97% |
| 5JNV   | <i>Bos taurus</i>       | 1.6 Å      | 6.5        | 4-(2-hydroxyethyl)-1-piperazine ethane sulphonic acid | 341.00              | 27.74% |

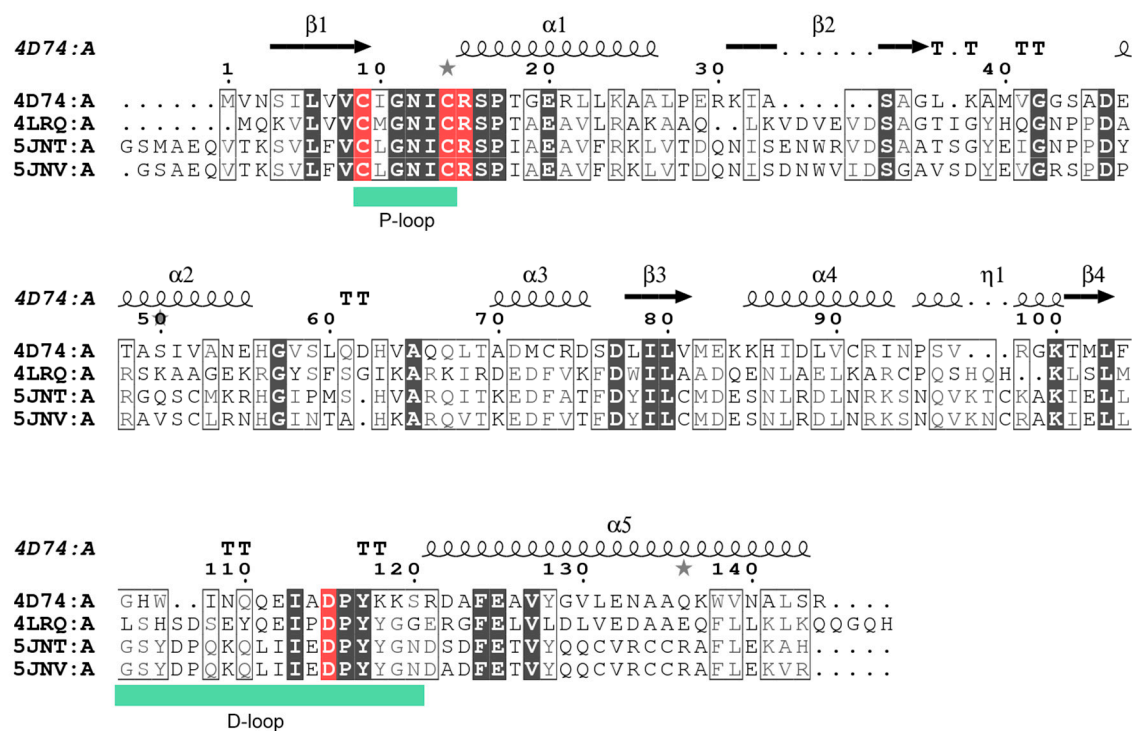

**Figure S1.** Alignment of selected structures for redocking. The alignment was generated with Clustal Omega[5], and the visualisation with ESPrnt 3.0[6]. Catalytic residues are highlighted in red, conserved residues in black, and P-loop and D-loop are delimited by green boxes.

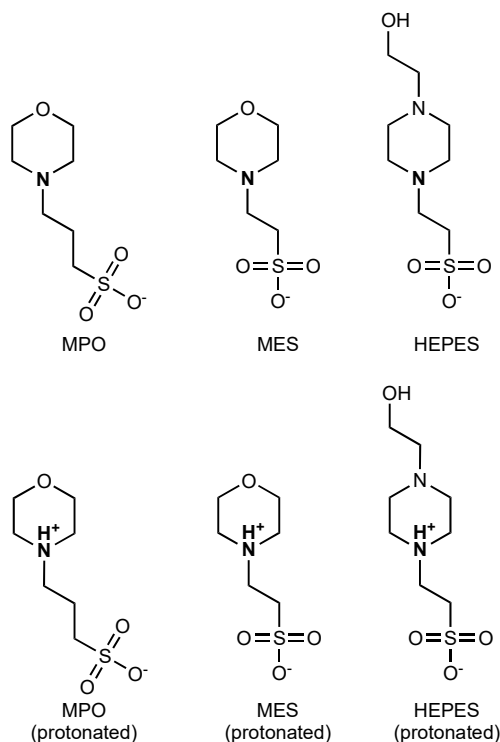

**Scheme S1.** Ligands used in molecular docking for software evaluation, and corresponding working names, in the two protonation states.

**Table S2.** RMSD of the poses docked by OpenEye FRED. Different protonation states of the protein structure were simulated using the H++ webserver and represented in each column.

| <b>OpenEye FRED</b>   |                    |             |          |          |          |
|-----------------------|--------------------|-------------|----------|----------|----------|
| Protein structure pH: |                    | unspecified | 5.5      | 6.5      | 7.4      |
| Structure             | Ligand             | RMSD (Å)    | RMSD (Å) | RMSD (Å) | RMSD (Å) |
| 4LRQ.c                | MPO                | 0.400       | 0.519    | -        | 0.519    |
|                       | MPO (protonated)   | 0.367       | 3.150    | -        | 0.495    |
| 5JNT                  | MES                | 0.400       | 0.395    | 0.395    | 0.390    |
|                       | MES (protonated)   | 1.047       | 1.119    | 1.119    | 1.105    |
| 5JNV                  | HEPES              | 1.098       | -        | 0.943    | 0.943    |
|                       | HEPES (protonated) | 0.833       | -        | 0.742    | 0.742    |

**Table S3.** RMSD of the poses docked by AutoDock Vina and AutoDock.

|               |                    | <b>AutoDock Vina</b> | <b>AutoDock</b> |          |
|---------------|--------------------|----------------------|-----------------|----------|
| Grid Spacing: |                    |                      | 0.375 Å         | 0.037 Å  |
| Structure     | Ligand             | RMSD (Å)             | RMSD (Å)        | RMSD (Å) |
| 4LRQ.C        | MPO                | 0.780                | 0.711           | 1.835    |
|               | MPO (protonated)   | 0.875                | 1.781           | 1.736    |
| 5JNT          | MES                | 1.154                | 1.877           | 1.72     |
|               | MES (protonated)   | 1.384                | 2.118           | 1.872    |
| 5JNV          | HEPES              | 2.354                | 2.447           | 1.785    |
|               | HEPES (protonated) | 1.876                | 2.056           | 1.390    |

**Table S4.** RMSDs of the poses docked by DOCK6.

| <b>DOCK6</b>          |                    |             |          |          |          |
|-----------------------|--------------------|-------------|----------|----------|----------|
| Protein structure pH: |                    | Unspecified | 5.5      | 6.5      | 7.4      |
| Grid spacing:         |                    | 0.1 Å       | 0.05 Å   | 0.05 Å   | 0.05 Å   |
| Structure             | Ligand             | RMSD (Å)    | RMSD (Å) | RMSD (Å) | RMSD (Å) |
| 4LRQ.c                | MPO                | 1.110       | 0.166    | -        | 0.190    |
|                       | MPO (protonated)   | 1.110       | 0.629    | -        | 0.184    |
| 5JNT                  | MES                | 0.280       | 0.270    | 0.598    | 0.598    |
|                       | MES (protonated)   | 0.262       | 0.346    | 0.416    | 0.416    |
| 5JNV                  | HEPES              | 0.936       | -        | 0.872    | 0.872    |
|                       | HEPES (protonated) | 0.656       | -        | 0.570    | 0.570    |

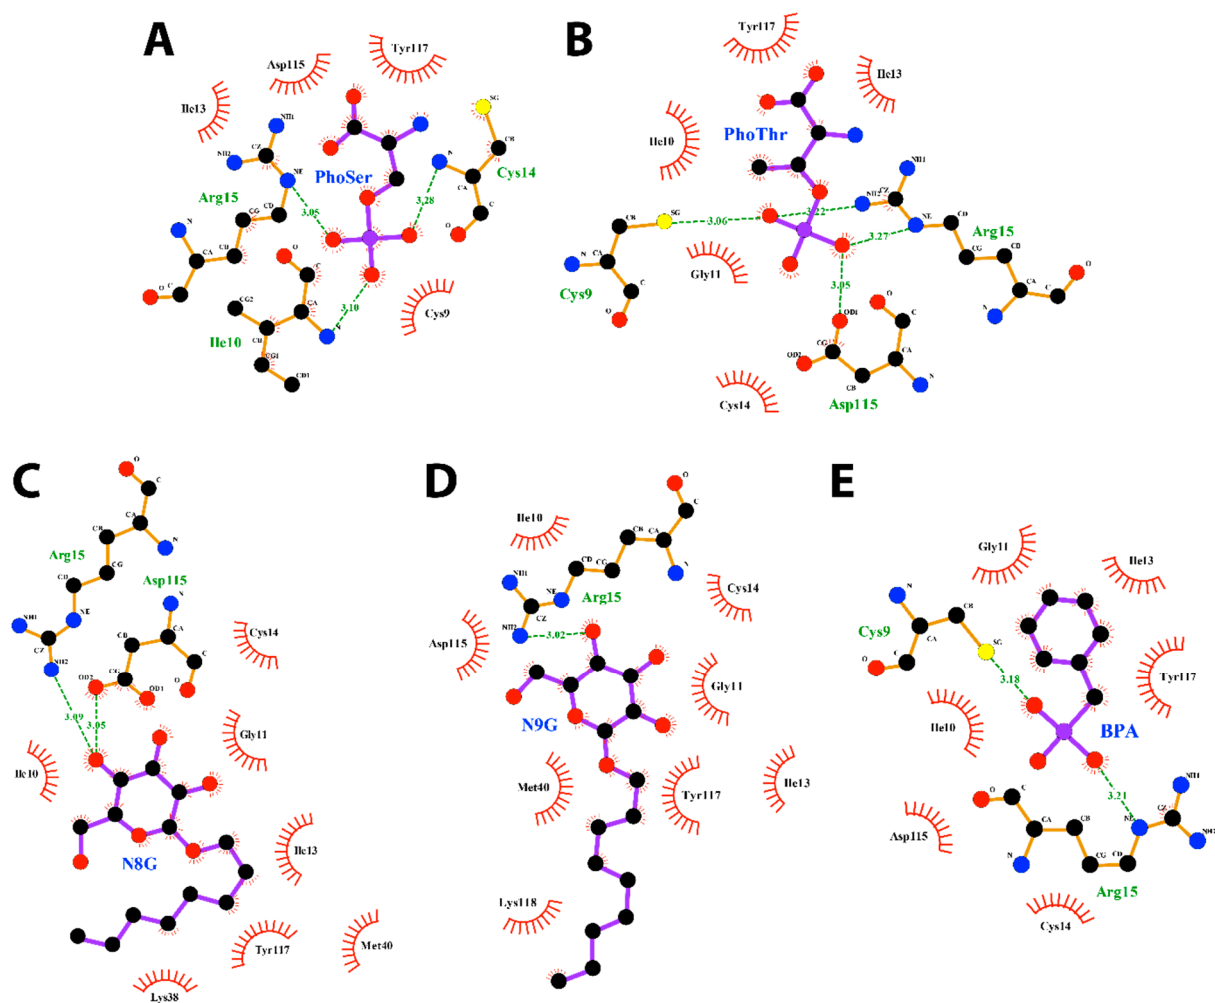

**Figure S2.** Scheme of the interactions between the docked PhoSer (**A**), PhoThr (**B**), N8G (**C**), N9G (**D**), and BPA (**E**) molecules and *EaAmsI*. The scheme represents H-bonds (dashed lines) and van der Waals interactions (red spiked arcs).

## References

1. Salomone-Stagni, M.; Musiani, F.; Benini, S. Characterization and 1.57 Å Resolution Structure of the Key Fire Blight Phosphatase AmsI from *Erwinia Amylovora*. *Acta Crystallogr. Sect. F Struct. Biol. Commun.* **2016**, *72*, 903–910, doi:10.1107/S2053230X16018781.
2. Nath, S.; Banerjee, R.; Sen, U. Atomic Resolution Crystal Structure of VcLMWPTP-1 from *Vibrio Cholerae* O395: Insights into a Novel Mode of Dimerization in the Low Molecular Weight Protein Tyrosine Phosphatase Family. *Biochem. Biophys. Res. Commun.* **2014**, *450*, 390–395, doi:10.1016/j.bbrc.2014.05.129.
3. Stanford, S.M.; Aleshin, A.E.; Zhang, V.; Ardecky, R.J.; Hedrick, M.P.; Zou, J.; Ganji, S.R.; Bliss, M.R.; Yamamoto, F.; Bobkov, A.A.; et al. Diabetes Reversal by Inhibition of the Low-Molecular-Weight Tyrosine Phosphatase. *Nat. Chem. Biol.* **2017**, *13*, 624–632, doi:10.1038/nchembio.2344.
4. Prlić, A.; Bliven, S.; Rose, P.W.; Bluhm, W.F.; Bizon, C.; Godzik, A.; Bourne, P.E. Pre-Calculated Protein Structure Alignments at the RCSB PDB Website. *Bioinformatics* **2010**, *26*, 2983–2985, doi:10.1093/bioinformatics/btq572.
5. Fast, Scalable Generation of High-quality Protein Multiple Sequence Alignments Using Clustal Omega | Molecular Systems Biology Available online: <https://www.embopress.org/doi/full/10.1038/msb.2011.75> (accessed on 6 July 2023).
6. Robert, X.; Gouet, P. Deciphering Key Features in Protein Structures with the New ENDscript Server. *Nucleic Acids Res.* **2014**, *42*, W320–W324.
